# Supplementary material for: Synchronizing ice-core and U ∕ Th timescales in the Last Glacial Maximum using Hulu Cave 14 C and new 10 Be measurements from Greenland and Antarctica
Source: Copernicus journal article supplement (doi:10.5194/cp-19-1153-2023), 2023-06-13
Supplement: Supplementary file 2 [file cp-19-1153-2023-supplement.zip]

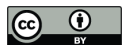

*Supplement of*

**Synchronizing ice-core and U / Th timescales in the Last Glacial Maximum using Hulu Cave  $^{14}\text{C}$  and new  $^{10}\text{Be}$  measurements from Greenland and Antarctica**

**Giulia Sinnl et al.**

*Correspondence to:* Giulia Sinnl (giulia.sinnl@nbi.ku.dk)

- cp-19-1153-2023-supplement-title-page.pdf
- supplement\_LGM\_sinnl\_et\_al\_revision
  - LGM\_NorthGRIP2\_WDC\_10Be\_Sinnl\_et\_al\_2022.xlsx
  - Supplementary\_figures\_LGM\_sinnl\_et\_al\_revision.pdf
  - wiggle\_matching\_sinnl\_et\_al\_2022
    - \* Delta14C\_Hulu\_measured\_detrended.mat
    - \* Delta14C\_modelled\_detrended.mat
    - \* bayes\_lag\_prob\_discont1.m
    - \* wiggle\_matching\_sinnl\_et\_al\_2022.asv
    - \* wiggle\_matching\_sinnl\_et\_al\_2022.m

The copyright of individual parts of the supplement might differ from the article licence.
